# Supplementary material for: Correlations between Antioxidant and Biochemical Parameters of Blood Serum of Duroc Breed Pigs
Source: MDPI journal article supplement (doi:10.3390/ani11082400), 2021-08-13
Supplement: s1 [file s1]

**Supplementary Materials to the manuscript**  
**“Correlations Between Antioxidant and Biochemical Parameters of Blood Serum of Duroc Breed Pigs”**  
**S.Yu. Zaitsev\*, A.A. Belous, O.A. Voronina, A.A. Savina, R.A. Rykov, N.V. Bogolyubova :**

**Table S1.** Correlations of biochemical parameters\* of the blood serum of the Duroc breed piglets in group 1 (65 days of fattening).

|         | TP     | A      | G      | A/G    | Urea   | Crt    | Glucose | TG     | Chol   | ALT    | AST    | AST/ALT | ALP    | Ca     | P      | Ca/P   | Mg     |
|---------|--------|--------|--------|--------|--------|--------|---------|--------|--------|--------|--------|---------|--------|--------|--------|--------|--------|
| TP      | 1.000  | 0.486  | 0.811  | -0.499 | 0.099  | 0.229  | -0.136  | -0.055 | 0.460  | 0.466  | 0.201  | -0.080  | -0.052 | -0.068 | 0.467  | -0.344 | 0.422  |
| A       | 0.486  | 1.000  | -0.117 | 0.468  | 0.117  | 0.123  | 0.031   | 0.102  | 0.261  | 0.512  | 0.293  | 0.004   | 0.129  | -0.075 | 0.398  | -0.310 | 0.219  |
| G       | 0.811  | -0.117 | 1.000  | -0.880 | 0.034  | 0.178  | -0.176  | -0.131 | 0.348  | 0.187  | 0.032  | -0.094  | -0.146 | -0.027 | 0.265  | -0.184 | 0.333  |
| A/G     | -0.499 | 0.468  | -0.880 | 1.000  | -0.063 | -0.134 | 0.105   | 0.074  | -0.214 | 0.068  | 0.060  | 0.029   | 0.143  | -0.018 | -0.070 | 0.036  | -0.239 |
| Urea    | 0.099  | 0.117  | 0.034  | -0.063 | 1.000  | 0.231  | 0.187   | 0.146  | 0.053  | -0.189 | 0.041  | 0.169   | -0.041 | 0.335  | 0.031  | 0.145  | 0.343  |
| Crt     | 0.229  | 0.123  | 0.178  | -0.135 | 0.231  | 1.000  | 0.206   | 0.176  | 0.138  | -0.072 | 0.098  | 0.088   | 0.323  | 0.149  | -0.157 | 0.182  | 0.261  |
| Glucose | -0.136 | 0.031  | -0.176 | 0.105  | 0.187  | 0.206  | 1.000   | 0.015  | -0.177 | -0.370 | 0.058  | 0.260   | 0.322  | 0.324  | -0.408 | 0.461  | 0.150  |
| TG      | -0.055 | 0.102  | -0.131 | 0.074  | 0.146  | 0.176  | 0.015   | 1.000  | 0.101  | 0.019  | -0.013 | -0.017  | 0.285  | -0.079 | 0.041  | -0.086 | 0.006  |
| Chol    | 0.460  | 0.261  | 0.348  | -0.214 | 0.053  | 0.138  | -0.177  | 0.101  | 1.000  | 0.471  | 0.089  | -0.174  | 0.084  | -0.298 | 0.531  | -0.528 | 0.025  |
| ALT     | 0.466  | 0.512  | 0.187  | 0.068  | -0.189 | -0.072 | -0.370  | 0.019  | 0.471  | 1.000  | 0.190  | -0.374  | 0.009  | -0.317 | 0.512  | -0.509 | -0.097 |
| AST     | 0.201  | 0.293  | 0.032  | 0.060  | 0.040  | 0.098  | 0.058   | -0.013 | 0.089  | 0.190  | 1.000  | 0.806   | -0.117 | 0.079  | -0.050 | 0.084  | 0.198  |
| AST/ALT | -0.080 | 0.004  | -0.094 | 0.029  | 0.169  | 0.088  | 0.260   | -0.017 | -0.173 | -0.374 | 0.806  | 1.000   | -0.093 | 0.261  | -0.334 | 0.368  | 0.285  |
| ALP     | -0.052 | 0.129  | -0.146 | 0.143  | -0.041 | 0.323  | 0.322   | 0.285  | 0.084  | 0.009  | -0.117 | -0.093  | 1.000  | 0.186  | -0.025 | 0.110  | 0.033  |
| Ca      | -0.068 | -0.075 | -0.027 | -0.018 | 0.335  | 0.149  | 0.324   | -0.079 | -0.298 | -0.317 | 0.079  | 0.261   | 0.186  | 1.000  | -0.365 | 0.770  | 0.372  |
| P       | 0.467  | 0.398  | 0.265  | -0.070 | 0.031  | -0.157 | -0.408  | 0.041  | 0.531  | 0.512  | -0.050 | -0.334  | -0.025 | -0.365 | 1.000  | -0.862 | 0.017  |
| Ca/P    | -0.344 | -0.310 | -0.184 | 0.036  | 0.145  | 0.182  | 0.461   | -0.086 | -0.527 | -0.509 | 0.084  | 0.368   | 0.110  | 0.770  | -0.862 | 1.000  | 0.210  |
| Mg      | 0.422  | 0.219  | 0.333  | -0.239 | 0.343  | 0.261  | 0.150   | 0.006  | 0.025  | -0.097 | 0.198  | 0.285   | 0.033  | 0.372  | 0.017  | 0.210  | 1.000  |

\* TP - total protein, A - albumin, G - globulins, Crt - creatinine, TG - triglycerides, Chol - cholesterol, ALT - alanine aminotransferase, AST - aspartate aminotransferase, ALP - alkaline phosphatase, Ca – calcium, P – phosphorus, Mg – magnesium.

**Table S2.** Correlations of biochemical parameters of the blood serum of the Duroc breed piglets in group 2 (72 days of fattening).

|         | TP     | A      | G      | A/G    | Urea   | Crt    | Glucose | TG     | Chol   | ALT    | AST    | AST/ALT | ALP    | Ca     | P      | Ca/P   | Mg     |
|---------|--------|--------|--------|--------|--------|--------|---------|--------|--------|--------|--------|---------|--------|--------|--------|--------|--------|
| TP      | 1.000  | 0.566  | 0.833  | -0.544 | 0.457  | 0.481  | -0.037  | 0.154  | 0.479  | 0.420  | 0.223  | -0.006  | 0.016  | -0.002 | 0.602  | -0.526 | 0.566  |
| A       | 0.566  | 1.000  | 0.015  | 0.341  | 0.322  | 0.230  | 0.102   | 0.117  | 0.296  | 0.594  | 0.224  | -0.099  | 0.067  | 0.092  | 0.508  | -0.360 | 0.834  |
| G       | 0.833  | 0.015  | 1.000  | -0.889 | 0.339  | 0.429  | -0.113  | 0.109  | 0.383  | 0.111  | 0.120  | 0.060   | -0.026 | -0.064 | 0.389  | -0.396 | -0.544 |
| A/G     | -0.544 | 0.341  | -0.889 | 1.000  | -0.175 | -0.297 | 0.099   | -0.104 | -0.267 | 0.098  | -0.054 | -0.120  | 0.0270 | 0.123  | -0.178 | 0.270  | 0.457  |
| Urea    | 0.457  | 0.322  | 0.339  | -0.175 | 1.000  | 0.493  | -0.078  | 0.050  | 0.246  | 0.117  | 0.307  | 0.239   | -0.032 | 0.362  | 0.346  | -0.076 | 0.481  |
| Crt     | 0.481  | 0.230  | 0.429  | -0.297 | 0.493  | 1.000  | -0.089  | 0.074  | 0.468  | 0.199  | 0.219  | 0.109   | 0.084  | -0.089 | 0.206  | -0.266 | -0.037 |
| Glucose | -0.037 | 0.102  | -0.113 | 0.099  | -0.078 | -0.089 | 1.000   | -0.023 | 0.109  | -0.081 | -0.090 | -0.105  | 0.339  | 0.001  | 0.091  | -0.062 | 0.154  |
| TG      | 0.154  | 0.117  | 0.109  | -0.104 | 0.050  | 0.074  | -0.023  | 1.000  | 0.170  | 0.217  | 0.146  | 0.019   | 0.262  | -0.031 | 0.065  | -0.103 | 0.479  |
| Chol    | 0.479  | 0.296  | 0.387  | -0.266 | 0.246  | 0.468  | 0.109   | 0.170  | 1.000  | 0.370  | 0.189  | -0.011  | 0.223  | -0.057 | 0.352  | -0.352 | 0.420  |
| ALT     | 0.420  | 0.595  | 0.111  | 0.098  | 0.117  | 0.199  | -0.081  | 0.217  | 0.370  | 1.000  | 0.269  | -0.222  | 0.084  | -0.037 | 0.323  | -0.288 | 0.223  |
| AST     | 0.223  | 0.224  | 0.120  | -0.054 | 0.307  | 0.219  | -0.090  | 0.146  | 0.190  | 0.268  | 1.000  | 0.866   | -0.338 | -0.069 | 0.143  | -0.161 | -0.006 |
| AST/ALT | -0.006 | -0.099 | 0.060  | -0.120 | 0.239  | 0.109  | -0.105  | 0.019  | -0.011 | -0.222 | 0.866  | 1.000   | -0.393 | -0.079 | -0.019 | -0.032 | 0.016  |
| ALP     | 0.016  | 0.067  | -0.026 | 0.027  | -0.032 | 0.084  | 0.339   | 0.262  | 0.223  | 0.0837 | -0.338 | -0.393  | 1.000  | 0.125  | 0.122  | -0.018 | -0.002 |
| Ca      | -0.002 | 0.092  | -0.064 | 0.123  | 0.362  | -0.089 | 0.001   | -0.031 | -0.057 | -0.037 | -0.070 | -0.080  | 0.125  | 1.000  | 0.065  | 0.595  | 0.602  |
| P       | 0.602  | 0.508  | 0.389  | -0.178 | 0.346  | 0.206  | 0.091   | 0.065  | 0.352  | 0.323  | 0.143  | -0.019  | 0.122  | 0.065  | 1.000  | -0.748 | -0.526 |
| Ca/P    | -0.526 | -0.360 | -0.396 | 0.270  | -0.076 | -0.266 | -0.062  | -0.103 | -0.352 | -0.288 | -0.161 | -0.032  | -0.018 | 0.595  | -0.748 | 1.000  | 0.775  |
| Mg      | 0.775  | 0.512  | 0.596  | -0.360 | 0.526  | 0.374  | -0.099  | -0.033 | 0.371  | 0.313  | 0.329  | 0.191   | -0.042 | 0.113  | 0.563  | -0.386 | 1.000  |

\* TP - total protein, A - albumin, G - globulins, Crt - creatinine, TG - triglycerides, Chol - cholesterol, ALT - alanine aminotransferase, AST - aspartate aminotransferase, ALP - alkaline phosphatase, Ca – calcium, P – phosphorus, Mg – magnesium.

1

2

3

**Table S3.** Correlations of biochemical parameters of the blood serum of the Duroc breed piglets in group 3 (100 days of fattening).

4

|         | TP     | A      | G      | A/G    | Urea   | Crt    | Glucose | TG     | Chol   | ALT    | AST    | AST/ALT | ALP    | Ca     | P      | Ca/P   | Mg     |
|---------|--------|--------|--------|--------|--------|--------|---------|--------|--------|--------|--------|---------|--------|--------|--------|--------|--------|
| TP      | 1.000  | 0.159  | 0.868  | -0.623 | -0.187 | -0.243 | 0.499   | 0.542  | -0.136 | 0.762  | 0.721  | -0.544  | 0.651  | 0.356  | 0.628  | 0.017  | 0.999  |
| A       | 0.159  | 1.000  | -0.351 | 0.665  | 0.320  | 0.019  | 0.440   | 0.311  | 0.429  | 0.549  | 0.187  | -0.152  | 0.642  | 0.238  | 0.720  | -0.237 | 0.159  |
| G       | 0.868  | -0.351 | 1.000  | -0.925 | -0.339 | -0.240 | 0.252   | 0.358  | -0.345 | 0.446  | 0.590  | -0.440  | 0.295  | 0.218  | 0.234  | 0.135  | 0.868  |
| A/G     | -0.623 | 0.665  | -0.925 | 1.000  | 0.360  | 0.120  | -0.052  | -0.206 | 0.408  | -0.149 | -0.380 | 0.270   | 0.031  | -0.084 | 0.119  | -0.261 | -0.623 |
| Urea    | -0.187 | 0.320  | -0.339 | 0.360  | 1.000  | -0.185 | -0.289  | 0.667  | 0.496  | -0.072 | -0.287 | 0.488   | -0.282 | -0.682 | 0.103  | 0.500  | -0.187 |
| Crt     | -0.243 | 0.019  | -0.240 | 0.120  | -0.185 | 1.000  | 0.272   | -0.261 | 0.221  | -0.157 | -0.304 | 0.341   | -0.122 | 0.144  | -0.298 | -0.140 | -0.243 |
| Glucose | 0.499  | 0.440  | 0.252  | -0.052 | -0.289 | 0.272  | 1.000   | 0.251  | -0.422 | 0.840  | 0.794  | -0.548  | 0.478  | 0.570  | 0.222  | -0.019 | 0.499  |
| TG      | 0.542  | 0.311  | 0.358  | -0.206 | 0.667  | -0.261 | 0.251   | 1.000  | 0.147  | 0.575  | 0.403  | -0.119  | 0.173  | -0.203 | 0.375  | 0.646  | 0.542  |
| Chol    | -0.136 | 0.429  | -0.345 | 0.408  | 0.496  | 0.221  | -0.422  | 0.147  | 1.000  | -0.256 | -0.653 | 0.485   | 0.204  | -0.228 | 0.463  | -0.154 | -0.136 |
| ALT     | 0.762  | 0.549  | 0.446  | -0.149 | -0.072 | -0.157 | 0.840   | 0.575  | -0.256 | 1.000  | 0.889  | -0.725  | 0.712  | 0.554  | 0.575  | 0.141  | 0.762  |
| AST     | 0.721  | 0.187  | 0.590  | -0.380 | -0.287 | -0.304 | 0.794   | 0.403  | -0.653 | 0.889  | 1.000  | -0.793  | 0.476  | 0.506  | 0.279  | 0.170  | 0.721  |
| AST/ALT | -0.544 | -0.152 | -0.440 | 0.270  | 0.488  | 0.341  | -0.548  | -0.119 | 0.485  | -0.725 | -0.793 | 1.000   | -0.656 | -0.834 | -0.325 | -0.123 | -0.544 |
| ALP     | 0.651  | 0.642  | 0.295  | 0.031  | -0.282 | -0.122 | 0.478   | 0.173  | 0.204  | 0.712  | 0.476  | -0.656  | 1.000  | 0.727  | 0.873  | -0.333 | 0.651  |
| Ca      | 0.356  | 0.238  | 0.218  | -0.084 | -0.682 | 0.144  | 0.570   | -0.203 | -0.228 | 0.554  | 0.506  | -0.834  | 0.727  | 1.000  | 0.302  | -0.169 | 0.356  |
| P       | 0.628  | 0.720  | 0.234  | 0.119  | 0.103  | -0.298 | 0.222   | 0.375  | 0.463  | 0.575  | 0.279  | -0.325  | 0.873  | 0.302  | 1.000  | -0.332 | 0.628  |
| Ca/P    | 0.017  | -0.237 | 0.135  | -0.261 | 0.500  | -0.140 | -0.019  | 0.646  | -0.154 | 0.141  | 0.170  | -0.123  | -0.333 | -0.169 | -0.332 | 1.000  | 0.017  |
| Mg      | 0.999  | 0.159  | 0.868  | -0.623 | -0.187 | -0.243 | 0.499   | 0.542  | -0.136 | 0.762  | 0.721  | -0.544  | 0.651  | 0.356  | 0.628  | 0.017  | 1.000  |

\* TP - total protein, A - albumin, G - globulins, Crt - creatinine, TG - triglycerides, Chol - cholesterol, ALT - alanine aminotransferase, AST - aspartate aminotransferase, ALP - alkaline phosphatase, Ca – calcium, P – phosphorus, Mg – magnesium.

6
